# Supplementary material for: Dissecting aggregation and seeding dynamics of α-Syn polymorphs using the phasor approach to FLIM
Source: PubMed Central journal article supplement (PMC9729209; doi:10.1038/s42003-022-04289-6), 2022-12-08
Supplement: 42003_2022_4289_MOESM1_ESM.pdf [file 42003_2022_4289_MOESM1_ESM.pdf]

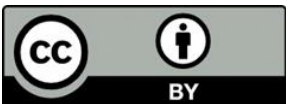

**Open Access** This file is licensed under a Creative Commons Attribution 4.0 International License, which permits use, sharing, adaptation, distribution and reproduction in any medium or format, as long as you give appropriate credit to the original author(s) and the source, provide a link to the Creative Commons license, and indicate if changes were made. In the cases where the authors are anonymous, such as is the case for the reports of anonymous peer reviewers, author attribution should be to 'Anonymous Referee' followed by a clear attribution to the source work. The images or other third party material in this file are included in the article's Creative Commons license, unless indicated otherwise in a credit line to the material. If material is not included in the article's Creative Commons license and your intended use is not permitted by statutory regulation or exceeds the permitted use, you will need to obtain permission directly from the copyright holder. To view a copy of this license, visit <http://creativecommons.org/licenses/by/4.0/>.

Reviewers' comments:

Reviewer #1 (Remarks to the Author):

In this work, Tittelmeier and co-worker report an original method to follow the  $\alpha$ -synuclein aggregation directly in cell using FLIM. The most interesting point is that the analysis of the mean fluorescent lifetime distribution can inform on the polymorphism of aggregates. The manuscript is clear and the discussion is supported by convincing results. However, several points should be clarified.

The FLIM involved the label of the  $\alpha$ -syn, here with YFP and ATTO647. The mean fluorescent lifetime of these dyes grafted and not on the  $\alpha$ -syn should be given as well as different stage aggregation of aggregation (with THT control) without cell.

The impact of YFP and ATTO647 affect the dynamic and the morphology of  $\alpha$ -syn should be evaluated and discussed.

It is possible to effect a fluorescent lifetime to an aggregate morphology ?

For the phasor image correspondence colour/ value of mean fluorescence lifetime should be given.

Reviewer #2 (Remarks to the Author):

Tittelmeier et al. used phasor approach of fluorescence lifetime imaging microscopy (FLIM) to study the aggregation properties of and seeding dynamics of different  $\alpha$ -Syn fibers in HEK 297T cell lines. Aggregation was assessed as decreased fluorescence lifetime of  $\alpha$ -SynA53T-YFP. Seeding capacity was assessed with different  $\alpha$ -Syn-Atto647 polymorphs. Interestingly, cellular clearance pathways yielded fibrillar species with higher fluorescence lifetime (less processed) but increased seeding capacity. Previous studies used phasor approach of FLIM to study the aggregation of proteins (e.g. <https://doi.org/10.1016/j.jcis.2020.03.107>), and FLIM has been used to study  $\alpha$ -Syn oligomerization (<https://faseb.onlinelibrary.wiley.com/doi/10.1096/fj.05-5422com>). Thus, as a method paper, the novelty of this study is limited. However, this study adds to the proof of principle application of these methods as well as the biology by 1) distinguish the seeding and aggregation property of different  $\alpha$ -Syn polymorphs; and 2) showing how cellular clearance pathways regulate fibrillar species as well as aggregate formation. The study is thus of interest to the field of protein aggregation and neurodegeneration, if the major concerns can be addressed.

Major concerns

1. Quantification and statistical analysis are lacking, and hence the conclusions are not well supported. Below are a few examples.

a. The authors conclude that FLIM is a powerful tool to distinguish different amyloid structures.

Without quantification and statistical analysis, it is unknown that whether the fluorescence lifetimes of different polymorph are distinguishable.

b. Figure 1c, the phasor plot of Ribbon treated  $\alpha$ -Syn-A53T-YFP seems similar to control and different from other polymorph treated ones, inconsistent with the statement 'no robust difference in lifetimes of  $\alpha$ -Syn-A53T-YFP upon seeding with distinct  $\alpha$ -Syn-A53T-YFP polymorphs could be observed' (line 112-113). Please quantitate and perform statistical analysis.

c. Figure 2., quantification and statistical analysis are needed to compare the lifetime properties of  $\alpha$ -Syn-Atto647 from all conditions. Is the lifetime distribution of Ribbon significantly different from  $\alpha$ -Syn monomers?

d. Figure 4 and 5., please perform statistical analysis for lifetime distribution between control and treatment groups.

2. It is unclear what we learn in a cell line can generalize to neurons or disease conditions. Please include data from neurons, or at least discuss this limitation.

Specific comments:

1. The study uses a mixture of  $\alpha$ -Syn-Atto647 fibrils and  $\alpha$ -SynA53T-YFP in most experiments. Please discuss whether this mixture is clinically relevant, and why A53T is relevant to use here. Do wild type  $\alpha$ -Syn-YFP display the same properties?
2. Figure 1., please include histograms of lifetime distribution.
3. Figure 2. Why would monomeric  $\alpha$ -Syn display lifetimes between 1.5ns and 1.8ns. Should we expect it to be entirely 1.8ns?
4. Supplement Figure 1D, Ribbon fiber is not able to induce significantly more foci in cells, consistent with that the phasor plot of Ribbon treated  $\alpha$ -Syn-A53T-YFP that looks like control in Fig. 1C. Please describe and discuss.
5. Supp. Figure 3C shows lifetime change of seeding fibers is caused purely by cellular processes without interactions with native  $\alpha$ -Syn. This is important. Please include it in main figures.
6. The study should cite more previous papers, including but not limited to the 2 mentioned in the opening paragraph.

Reviewer #3 (Remarks to the Author):

This study describes the use of Fluorescence lifetime imaging microscopy (FLIM) combined with phasor analysis to monitor the properties of seeded  $\alpha$ -synuclein aggregates in mammalian cells. The study shows convincingly that the phasor analysis is suited to identify differences in the *in vivo* properties of  $\alpha$ -synuclein polymorphs, and provides evidence that amyloid seeds are remodeled *in vivo* over time. The authors attempt to include some mechanistic studies by evaluating the effects of lysosomal, proteasomal and chaperone inhibition on the properties of the  $\alpha$ -synuclein seeds. However, the effects on the FLIM properties are generally quite subtle, and leave the reviewer wonder about what new information we learn from this analysis. Altogether, this study is very descriptive and provides little new insights into  $\alpha$ -synuclein aggregation *in vivo*.

Major comments:

- 1) Although the authors conclude from their data that highly seeding competent degradation products are produced from some of their polymorphs, there is no direct evidence provided that there are more seeding competent species formed.
- 2) The effects of inhibiting the proteasome/DnaJ according to FLIM are quite subtle especially given that the controls themselves seem highly variable
- 3) What is the physiological consequence of cells having more or fewer foci? Does the size of the foci change?

1 Dear Reviewers,  
2 Thank you for the thorough and insightful evaluation of our manuscript. We have carefully  
3 addressed your remarks and submitted a revised manuscript for reconsideration. The changes  
4 we made are labeled in red. Detailed responses to each of your concerns are listed under the  
5 individual comments.

6 We believe that the new data strengthen our initial findings and conclusions about FLIM  
7 being a powerful tool that can distinguish different amyloid structures and can be used to  
8 monitor the dynamic process of amyloid remodeling by the cellular environment. We  
9 therefore hope that you and the Editor will find our manuscript suitable for publication in  
10 Communications Biology.

11 Sincerely,  
12 Carmen Nußbaum-Krammer

13

14 Reviewers' comments:

15

16 Reviewer #1

17

18 In this work, Tittelmeier and co-worker report an original method to follow the  $\alpha$ -synuclein  
19 aggregation directly in cell using FLIM. The most interesting point is that the analysis of the  
20 mean fluorescent lifetime distribution can inform on the polymorphism of aggregates. The  
21 manuscript is clear and the discussion is supported by convincing results. However, several  
22 points should be clarified.

23 We thank the reviewer for the overall positive feedback on the manuscript. We have  
24 addressed your comments below.

25

26 1: The FLIM involved the label of the  $\alpha$ -syn, here with YFP and ATTO647. The mean  
27 fluorescent lifetime of these dyes grafted and not on the  $\alpha$ -syn should be given as well as  
28 different stage aggregation of aggregation (with THT control) without cell.

29 The fluorescence lifetime is an intrinsic characteristic of a fluorophore. According to the  
30 fluorophore database FBbase, the fluorescent lifetime of enhanced YFP is 3.1 ns  
31 (<https://www.fpbase.org/protein/eyfp/>). However, many different aspects can affect the  
32 lifetime of fluorophores, for example attaching a protein. When YFP is fused to  $\alpha$ -Syn and in  
33 a cellular environment, its lifetime is around 2.9 ns (Schierle et al. 2011). The same is true for  
34 Atto674. The lifetime of the fluorophore alone is 2.4 ns (<https://www.atto-tec.com/ATTO-647.html?language=en>), while monomeric  $\alpha$ -Syn-Atto647 has a lifetime of 1.7 ns (Figure 2E).  
35 Since both fluorophores do not aggregate, a reference value for the aggregated protein itself  
36 cannot be provided.

37  
38 Therefore, we think it is more meaningful to measure the lifetimes of non-aggregated  $\alpha$ -  
39 SynA53T-YFP and  $\alpha$ -Syn-Atto647 to determine a reference value for the soluble proteins in  
40 our system and then compare it to the values obtained with the aggregated proteins.

41

42 2: The impact of YFP and ATTO647 affect the dynamic and the morphology of  $\alpha$ -syn should  
43 be evaluated and discussed.

44 Attaching a fluorophore might impact the dynamic and morphology of the respective  
45 protein. We have added the following sentences to discuss that with respect to  $\alpha$ -SynA53T-

46 YFP: “While seeded aggregation did lead to a shorter fluorescence lifetime signal of the  
47 endogenous  $\alpha$ -SynA53T-YFP reporter, the characteristic fluorescence lifetimes of the  
48 respective seeds were not replicated (Fig. 1). This was unexpected as amyloid propagation is  
49 generally thought to involve templated incorporation of monomers at the ends of the filaments,  
50 thereby preserving the conformation of the seed. Two reasons could explain why endogenous  
51  $\alpha$ -SynA53T-YFP showed minimal variation when its aggregation is triggered by different  $\alpha$ -  
52 Syn polymorphs in FLIM. First,  $\alpha$ -SynA53T-YFP might not be able to adopt the exact  
53 conformation of the seed due to the specific conditions of the cellular environment, which  
54 substantially differ from the conditions the seeds were made in regarding salt concentration,  
55 pH, etc. (Bousset et al. 2013; Grozdanov et al. 2019). Second, the attached fluorophore could  
56 prevent  $\alpha$ -SynA53T-YFP from adopting the exact conformation of the seed (Afitska et al. 2017;  
57 Caputo et al. 2020). In both cases, the observed seeded aggregation would result primarily from  
58 secondary nucleation events rather than from a templated addition of monomers at fibrils ends  
59 (de Oliveira and Silva 2019). Thus, the conformation of fibrils formed by secondary nucleation  
60 events would be predominantly determined by solution conditions and intrinsic structural  
61 preferences rather than by the seed conformation (Hadi Alijanvand, Peduzzo, and Buell 2021).”  
62 (page 10, line 281).

63  
64 We want to point out that this is less likely for the ATTO647-labelled  $\alpha$ -Syn polymorphs,  
65 since the fluorophore is attached to the fibers after and not during their assembly. We have  
66 added the following sentence to indicate this: “In this case, fluorophores are attached to lysine  
67 residues exposed at the surfaces of the fibrils after assembly and therefore do not affect the  
68 conformation of the distinct polymorphs.” (page 11, line 297). We have also described this in  
69 the materials and methods section.

70

71 **3: It is possible to effect a fluorescent lifetime to an aggregate morphology?**

72 We believe this is possible and we hope that the additional data we provided support this  
73 claim. We show in Figure 3A that different  $\alpha$ -Syn polymorphs display different fluorescence  
74 lifetime signatures. To better highlight that the fluorescence lifetime of the Atto647  
75 fluorophore is significantly affected by the aggregate morphology, we have expanded Figure  
76 3 to show the weighted mean fluorescence lifetime with statistics (new Figure 3C).

77 The distinct structure of these polymorphs can be appreciated in the EM images displayed in  
78 Supplementary Figure S1A. Moreover, they have been extensively characterized previously  
79 (Rey et al. 2019; Shrivastava et al. 2020; Makky et al. 2016; Landureau et al. 2021). To  
80 clarify that the polymorphs have distinct morphologies we added the following statement with  
81 additional references (page 5, lines 113): “In addition to Fibrils, we seeded the biosensor cell  
82 line with other structurally well-characterized fibrillar  $\alpha$ -Syn polymorphs, F65, F91, and  
83 Ribbons (Makky et al. 2016; Landureau et al. 2021; Rey et al. 2019; Shrivastava et al. 2020).  
84 These polymorphs differ in the amino acids located in their core and those exposed at their  
85 surface, resulting in a distinct fiber architecture (Supplementary Fig. 1A)(Makky et al. 2016;  
86 Landureau et al. 2021; Rey et al. 2019; Shrivastava et al. 2020).”

87

88 **4: For the phasor image correspondence colour/ value of mean fluorescence lifetime should**  
89 **be given.**

90 We thank the reviewer for this important suggestion. We have added the mean fluorescence  
91 lifetime to all of the figures. By comparing the means we can now show that the differences  
92 we claimed were indeed significant, which strengthens the study.

93  
94  
95 Reviewer #2 (Remarks to the Author):

96  
97 Tittelmeier et al. used phasor approach of fluorescence lifetime imaging microscopy (FLIM)  
98 to study the aggregation properties of and seeding dynamics of different  $\alpha$ -Syn fibers in HEK  
99 297T cell lines. Aggregation was assessed as decreased fluorescence lifetime of  $\alpha$ -SynA53T-  
100 YFP. Seeding capacity was assessed with different  $\alpha$ -Syn-Atto647 polymorphs. Interestingly,  
101 cellular clearance pathways yielded fibrillar species with higher fluorescence lifetime (less  
102 processed) but increased seeding capacity. Previous studies used phasor approach of FLIM to  
103 study the aggregation of proteins (e.g. <https://doi.org/10.1016/j.jcis.2020.03.107>), and FLIM  
104 has been used to study  $\alpha$ -Syn oligomerization  
105 (<https://faseb.onlinelibrary.wiley.com/doi/10.1096/fj.05-5422com>). Thus, as a method paper,  
106 the novelty of this study is limited. However, this study adds to the proof of principle  
107 application of these methods as well as the biology by 1) distinguish the seeding and  
108 aggregation property of different  $\alpha$ -Syn polymorphs; and 2) showing how cellular clearance  
109 pathways regulate fibrillar species as well as aggregate formation. The study is thus of interest  
110 to the field of protein aggregation and neurodegeneration, if the major concerns can be  
111 addressed.

112  
113 We thank the reviewer for the comments highlighting what our study adds to the fields of  
114 protein aggregation and neurodegeneration.

115  
116 Major concerns

117  
118 1. Quantification and statistical analysis are lacking, and hence the conclusions are not well  
119 supported. Below are a few examples.

120 a. The authors conclude that FLIM is a powerful tool to distinguish different amyloid  
121 structures. Without quantification and statistical analysis, it is unknown that whether the  
122 fluorescence lifetimes of different polymorph are distinguishable.

123 We agree with the reviewer that quantification and statistical analysis were missing. We have  
124 added the additional quantification of the weighted mean of the fluorescence lifetimes to  
125 every experiment and have performed statistical analysis. We believe that this supports our  
126 conclusions.

127  
128 b. Figure 1c, the phasor plot of Ribbon treated  $\alpha$ -Syn-A53T-YFP seems similar to control and  
129 different from other polymorph treated ones, inconsistent with the statement 'no robust  
130 difference in lifetimes of  $\alpha$ -Syn-A53T-YFP upon seeding with distinct  $\alpha$ -Syn-A53T-YFP  
131 polymorphs could be observed' (line 112-113). Please quantitate and perform statistical  
132 analysis.

133 We thank the reviewer for pointing this out. With the addition of the new analysis, we show  
134 that Ribbons are indeed similar to the control and significantly different from the other  
135 polymorphs. We have updated the manuscript (page 5 lines 117) to state:  
136 “F65 and F91 polymorphs induced the formation of  $\alpha$ -SynA53T-YFP foci (Supplementary  
137 Fig. 1C), leading to a decreased mean fluorescence lifetime of  $\alpha$ -SynA53T-YFP in seeded  
138 compared to non-seeded cells similar to Fibrils (Fig. 1E-G). Ribbons had the lowest seeding  
139 capacities of the different polymorphs in our experimental model (Supplementary Fig. 1C),  
140 which was reflected by an unchanged fluorescence lifetime distribution and no significant  
141 difference in the mean lifetime of  $\alpha$ -SynA53T-YFP compared to the control (Fig. 1E-G).  
142 Selection of short-lived  $\alpha$ -SynA53T-YFP species on the phasor plot in Ribbon-seeded cells  
143 revealed that they localized to foci (Fig. 1E). However, these foci also contained  $\alpha$ -SynA53T-  
144 YFP species with longer fluorescence lifetimes, resulting in a significantly higher mean than  
145 the mean fluorescence lifetime of  $\alpha$ -SynA53T-YFP species in foci seeded with Fibrils, F65 or  
146 F91 polymorphs (Fig. 1E, Supplementary Fig. 1D). No robust difference in the mean  
147 fluorescence lifetimes of  $\alpha$ -SynA53T-YFP in foci seeded with Fibrils, F65 or F91 polymorphs  
148 could be detected (Supplementary Fig. 1D). Hence, the seeded aggregation of endogenous  $\alpha$ -  
149 SynA53T-YFP by the addition of exogenous  $\alpha$ -Syn polymorphs Fibrils, F65 and F91 led to  
150 the accumulation of short-lived protein species, whereby the conformation of the added seeds  
151 did not cause a significant difference in the respective fluorescence lifetimes.”

152

153 c. Figure 2., quantification and statistical analysis are needed to compare the lifetime  
154 properties of  $\alpha$ -Syn-Atto647 from all conditions. Is the lifetime distribution of Ribbon  
155 significantly different from  $\alpha$ -Syn monomers?

156 Analysis of the mean fluorescence lifetime shows there is no significant difference between  
157 monomeric  $\alpha$ -Syn and Ribbon polymorphs (new Figure 2F).

158

159 d. Figure 4 and 5., please perform statistical analysis for lifetime distribution between control  
160 and treatment groups.

161 This analysis was added to the new Figure 5B, D, F and Figure 6B, E, H (previously figures 4  
162 and 5).

163

164 2. It is unclear what we learn in a cell line can generalize to neurons or disease conditions.

165 Please include data from neurons, or at least discuss this limitation.

166

167 We have added the following paragraph to discuss this limitation (page 12, lines 336):

168 “Having limited this study to a HEK biosensor cell line, it would be of interest to investigate  
169 seeded aggregation of  $\alpha$ -Syn in other cell types, such as neurons or oligodendrocytes to assess  
170 whether the processing of fibrillar  $\alpha$ -Syn is also differentially affected by the cellular milieu  
171 (Peng et al. 2018). Future studies using patient-derived  $\alpha$ -Syn conformers in more disease-  
172 relevant cell types may reveal potential disease-specific members of the proteostasis network  
173 that influence the seeded aggregation of  $\alpha$ -Syn, which could explain the heterogeneity of  
174 synucleinopathies and pave the way toward disease-specific therapeutics (Hoppe, Uzunoğlu,  
175 and Nussbaum-Krammer 2021).

176 However, regardless of the exact degradation machinery involved, processing of  $\alpha$ -Syn fibers  
177 by cellular clearance pathways generally yielded species with high seeding capacity that  
178 enhanced aggregation of endogenous  $\alpha$ -Syn (Fig. 5, 6, Supplementary Fig. 5, 6, 7)".  
179 Of note, we did not investigate neuron-specific pathways or genes. Autophagy and the  
180 ubiquitin-proteasome system are the two major proteolytic systems in all eukaryotic cells, and  
181 the Hsp70 disaggregase is conserved in metazoan. While there might be some differences in  
182 the composition of the proteostasis network between neuronal and non-neuronal cells, the  
183 core machinery is highly conserved between all cell types, and therefore it is very likely that  
184 our findings can be generalized to neurons or disease conditions.

185

186 Specific comments:

187 1. The study uses a mixture of  $\alpha$ -Syn-Atto647 fibrils and  $\alpha$ -SynA53T-YFP in most  
188 experiments. Please discuss whether this mixture is clinically relevant, and why A53T is  
189 relevant to use here. Do wild type  $\alpha$ -Syn-YFP display the same properties?

190 We used the biosensor cell line expressing A53T mutant  $\alpha$ -Syn because it is more sensitive to  
191 the addition of exogenous seeds than cells expressing WT  $\alpha$ -Syn. This is based on the  
192 description in the original study that established this biosensor cell line, which states: "In the  
193 HEK cells expressing  $\alpha$ -syn140-YFP, we found 25–30% of the cells developed aggregates  
194 upon exposure to 30 nM  $\alpha$ -syn140\*A53T fibrils, whereas over 50% of the cells expressing  $\alpha$ -  
195 syn140\*A53T-YFP exhibited aggregates in the presence of the fibrils (Fig. 2). Based on these  
196 findings, we chose the  $\alpha$ -syn140\*A53T-YFP cells for further study (Woerman et al. 2015)."  
197 Moreover, this cell line was successfully used to detect fibrillar material of different  $\alpha$ -Syn  
198 mutants (Boyer et al. 2019; 2020; Woerman et al. 2015). We have added this information to  
199 the materials and methods section (page 13, line 400) "This biosensor cell line was shown to  
200 be highly sensitive in detecting a variety of different fibrillar  $\alpha$ -Syn species". As to the  
201 fibrillar polymorphs we used, they have been shown to trigger different pathologies in vivo  
202 (Peelaerts et al. 2015; Rey et al. 2019) and to seed the aggregation of  $\alpha$ -Syn to different  
203 extents in vitro (Shrivastava et al. 2020).

204

205 2. Figure 1., please include histograms of lifetime distribution.

206 We have moved the histograms from Supplementary Figure 1 to the main Figure 1C and F.

207

208 3. Figure 2. Why would monomeric  $\alpha$ -Syn display lifetimes between 1.5ns and 1.8ns. Should  
209 we expect it to be entirely 1.8ns?

210 In an undisturbed environment in a well-defined buffer solution, we would expect it to be a  
211 single value of 1.8 ns. However, in our microscopy setup, we are not able to image  
212 monomeric  $\alpha$ -Syn-Atto647 in a test tube. We have to transfect it into cells instead. Since the  
213 local concentration of a monomeric protein is significantly lower than that of an aggregate, it  
214 is much harder to detect than aggregated protein. Therefore, to detect monomeric  $\alpha$ -Syn-  
215 Atto647, we transfected 10x more protein (1  $\mu$ M of the monomer compared to 100 nM used  
216 for the respective polymorphs), which might favor intermolecular interactions. Also,  $\alpha$ -Syn is  
217 able to form tetrameric forms and interact with membranes (Bartels, Choi, and Selkoe 2011;  
218 Musteikytė et al. 2021). This could all affect the lifetime of the attached fluorophore.  
219 However, this is pure speculation. After statistical analysis, we now state the mean fluorescent  
220 lifetime of the monomer in the cellular environment (page 6 line 152).



221

222 4. Supplement Figure 1D, Ribbon fiber is not able to induce significantly more foci in cells,  
223 consistent with that the phasor plot of Ribbon treated  $\alpha$ -Syn-A53T-YFP that looks like control  
224 in Fig. 1C. Please describe and discuss.

225 The reviewer raises an important issue that is also related to their point 1b. Ribbons show a  
226 similar fluorescence lifetime as the control, as they are not able to induce significantly more  
227 foci in cells compared to the control. We have updated the manuscript to state the following  
228 (page 5, line 120) “Ribbons had the lowest seeding capacities of the different polymorphs in  
229 our experimental model (Supplementary Fig. 1C), which was reflected by an unchanged  
230 fluorescence lifetime distribution and no significant difference in the mean lifetime of  $\alpha$ -  
231 SynA53T-YFP compared to the control (Fig. 1E-G). Selection of short-lived  $\alpha$ -SynA53T-  
232 YFP species on the phasor plot in Ribbon-seeded cells revealed that they localized to foci  
233 (Fig. 1E). However, these foci also contained  $\alpha$ -SynA53T-YFP species with longer  
234 fluorescence lifetimes, resulting in a significantly higher mean than the mean fluorescence  
235 lifetime of  $\alpha$ -SynA53T-YFP species in foci seeded with Fibrils, F65 or F91 polymorphs (Fig.  
236 1E, Supplementary Fig. 1D).”

237

238 5. Supp. Figure 3C shows lifetime change of seeding fibers is caused purely by cellular  
239 processes without interactions with native  $\alpha$ -Syn. This is important. Please include it in main  
240 figures.

241 We agree with the reviewer that this is an important control and have moved data from  
242 Supplementary Figure 3C to the main Figure 3C.

243

244 6. The study should cite more previous papers, including but not limited to the 2 mentioned in  
245 the opening paragraph.

246 We have added the following citations (bold) for the manuscript to cite more papers that  
247 apply FLIM to investigate aggregation (page 3, line 61).

248 Aggregation into an amyloid fiber leads to quenching of an attached fluorophore due to  
249 compaction and crowding, thus reducing its fluorescence lifetime (Schierle et al. 2011; Chen  
250 et al. 2016). This can be measured using fluorescence lifetime imaging microscopy (FLIM)  
251 (Schierle et al. 2011; Chen et al. 2016; **Gallrein et al. 2021; Hardenberg et al. 2021; De**  
252 **Luca et al. 2020**). Therefore, FLIM is increasingly used to investigate aggregation processes  
253 in various models (Sandhof et al. 2020; Esbjörner et al. 2014; Laine et al. 2019; **Klucken et**  
254 **al. 2006; Pigazzini et al. 2020**).

255

256 Reviewer #3 (Remarks to the Author):

257

258 This study describes the use of Fluorescence lifetime imaging microscopy (FLIM) combined  
259 with phasor analysis to monitor the properties of seeded  $\alpha$ -synuclein aggregates in  
260 mammalian cells. The study shows convincingly that the phasor analysis is suited to identify  
261 differences in the in vivo properties of  $\alpha$ -synuclein polymorphs, and provides evidence that  
262 amyloid seeds are remodeled in vivo over time. The authors attempt to include some  
263 mechanistic studies by evaluating the effects of lysosomal, proteasomal and chaperone  
264 inhibition on the properties of the  $\alpha$ -synuclein seeds. However, the effects on the FLIM  
265 properties are generally quite subtle, and leave the reviewer wonder about what new

266 information we learn from this analysis. Altogether, this study is very descriptive and  
267 provides little new insights into  $\alpha$ -synuclein aggregation *in vivo*.

268

269 Major comments:

270 1) Although the authors conclude from their data that highly seeding competent degradation  
271 products are produced from some of their polymorphs, there is no direct evidence provided  
272 that there are more seeding competent species formed.

273

274 We have actually dedicated an entire study to the detailed characterization of the specific  
275 products generated by the Hsp70 disaggregation machinery. We have disaggregated the Fibril  
276 polymorph with the Hsp70 disaggregation machinery and separated the liberated products by  
277 centrifugation and tested their individual seeding capacity in our biosensor cell line (Figure  
278 for Reviewers). The data show that disaggregation of Fibrils generates more seeding  
279 competent species. Smaller fragments and oligomeric species isolated from the total  
280 disaggregation reaction have a higher seeding capacity. Monomeric species isolated from the  
281 total disaggregation reaction were not seeding competent.

282

283 This dataset is part of a comprehensive collaborative study with the laboratory of Bernd  
284 Bukau, which includes the use of well controlled *in vitro* experiments with purified  
285 components. The manuscript will be published separately at a later time.

286 In the study described here, our scope was to characterize the seeded aggregation in the  
287 cellular environment *in situ* by using FLIM, without additional manipulations by lysis and  
288 centrifugation. Our data show that the occurrence of fibrillar species with intermediate  
289 fluorescence lifetimes nicely/perfectly correlates with the seeding efficiency of the  
290 polymorphs. Whenever we significantly interfere with this processing by pharmacological or  
291 genetic inhibition of major degradation or disaggregation pathways, there is a significant  
292 reduction in the seeding capacity of the respective polymorphs. FLIM is able to directly  
293 visualize these intermediate fibrillar species and shows that they preferentially colocalize with  
294 endogenous  $\alpha$ -SynA53T-YFP foci (Figure 4D). Moreover, we now provide quantifications  
295 and statistical tests that strengthen our results. Therefore, we think it is valid to conclude from  
296 these data that the products produced from the polymorphs by cellular processing exhibit  
297 increased seeding propensity.

298

299 2) The effects of inhibiting the proteasome/DnaJ according to FLIM are quite subtle  
300 especially given that the controls themselves seem highly variable

301 This is an important point that needed clarification. We performed additional quantifications  
302 and statistical analysis of the different treatments to show that the mean fluorescence lifetime  
303 of the seeds is significantly shorter in treated samples in comparison to the controls. This  
304 supports our claim that that the seeds are significantly less processed and that significantly  
305 less species with longer lifetimes are generated, which correlates with a lower seeding  
306 capacity. We have added these data to Figure 5D, F and 6E, H and Supplementary Figure 5H,  
307 6H, and 7H (previously Figure 4 and 5).

308

309 3) What is the physiological consequence of cells having more or fewer foci? Does the size of  
310 the foci change?

311 The HEK biosensor cells used in this study are widely used to detect and quantify the  
312 presence of seeding-competent protein species (Boyer et al. 2019; 2020; Woerman et al.  
313 2015). These seeding-competent protein species are believed to drive disease progression  
314 because they are able to self-propagate and correlate with cytotoxicity in patients and animal  
315 models (Boyer et al. 2019; 2020; Woerman et al. 2015). However, HEK cells are quite robust  
316 and there is only little physiological consequence for these cells having foci. This is likely due  
317 to the fact that this cell line is rapidly dividing, unlike neurons in the human brain or other cell  
318 types that are terminally differentiated. Therefore, toxic protein species do not accumulate but  
319 are diluted during continuous cell divisions. The question regarding physiological  
320 consequences needs to be addressed in more sophisticated model systems, such as animal  
321 models. However, we believe that this is beyond the scope of our study, which was to  
322 establish the use of FLIM to monitor  $\alpha$ -Syn seeding and aggregation dynamics in the cellular  
323 environment and to show that FLIM allows the detection of different fibrillar species in cells  
324 *in situ*.  
325 Regarding the size of the foci, we did observe an intriguing change in the size and shape of  
326 the foci after knockdown of DNAJB1. We have described this observation on page 9, line  
327 229: “Of note, while DNAJB1 KD reduced foci formation in general, we noticed an increase  
328 in elongated foci as opposed to the typical spherical foci (Supplementary Fig. 5D zoom, 5E),  
329 suggesting that DNAJB1 may affect not only exogenously added seeds but also endogenous  
330  $\alpha$ -SynA53T-YFP aggregates.”

331  
332  
333

#### 334 **References:**

- 335 Afitska, Kseniia, Anna Fucikova, Volodymyr V. Shvadchak, and Dmytro A. Yushchenko.  
336 2017. “Modification of C Terminus Provides New Insights into the Mechanism of  $\alpha$ -  
337 Synuclein Aggregation.” *Biophysical Journal* 113 (10): 2182–91.  
338 <https://doi.org/10.1016/j.bpj.2017.08.027>.
- 339 Bartels, Tim, Joanna G. Choi, and Dennis J. Selkoe. 2011. “ $\alpha$ -Synuclein Occurs  
340 Physiologically as a Helically Folded Tetramer That Resists Aggregation.” *Nature* 477  
341 (7362): 107. <https://doi.org/10.1038/NATURE10324>.
- 342 Bousset, Luc, Laura Pieri, Gemma Ruiz-Arlandis, Julia Gath, Poul Henning Jensen, Birgit  
343 Habenstein, Karine Madiona, et al. 2013. “Structural and Functional Characterization of  
344 Two Alpha-Synuclein Strains.” *Nature Communications* 4.  
345 <https://doi.org/10.1038/ncomms3575>.
- 346 Boyer, David R., Binsen Li, Chuanqi Sun, Weijia Fan, Michael R. Sawaya, Lin Jiang, and  
347 David S. Eisenberg. 2019. “Structures of Fibrils Formed by  $\alpha$ -Synuclein Hereditary  
348 Disease Mutant H50Q Reveal New Polymorphs.” *Nature Structural & Molecular  
349 Biology* 26 (11): 1044. <https://doi.org/10.1038/S41594-019-0322-Y>.
- 350 Boyer, David R., Binsen Li, Chuanqi Sun, Weijia Fan, Kang Zhou, Michael P. Hughes,  
351 Michael R. Sawaya, Lin Jiang, and David S. Eisenberg. 2020. “The  $\alpha$ -Synuclein  
352 Hereditary Mutation E46K Unlocks a More Stable, Pathogenic Fibril Structure.”  
353 *Proceedings of the National Academy of Sciences of the United States of America* 117  
354 (7): 3592–3602. <https://doi.org/10.1073/PNAS.1917914117/-/DCSUPPLEMENTAL>.
- 355 Caputo, Anna, Yuling Liang, Tobias D. Raabe, Angela Lo, Mian Horvath, Bin Zhang,  
356 Hannah J. Brown, Anna Stieber, and Kelvin C. Luk. 2020. “Snca-GFP Knock-In Mice  
357 Reflect Patterns of Endogenous Expression and Pathological Seeding.” *ENeuro* 7 (4): 1–  
358 18. <https://doi.org/10.1523/ENEURO.0007-20.2020>.

359 Chen, WeiYue, Laurence J. Young, Meng Lu, Alessio Zaccane, Florian Ströhl, Na Yu,  
360 Gabriele S. Kaminski Schierle, and Clemens F. Kaminski. 2016. "Fluorescence Self-  
361 Quenching from Reporter Dyes Informs on the Structural Properties of Amyloid Clusters  
362 Formed in Vitro and in Cells." *Nano Letters* 17 (1): 143–49.  
363 <https://doi.org/10.1021/ACS.NANOLETT.6B03686>.

364 Esbjörner, Elin K., Fiona Chan, Eric Rees, Miklos Erdelyi, Leila M. Luheshi, Carlos W.  
365 Bertoncini, Clemens F. Kaminski, Christopher M. Dobson, and Gabriele S. Kaminski  
366 Schierle. 2014. "Direct Observations of Amyloid  $\beta$  Self-Assembly in Live Cells Provide  
367 Insights into Differences in the Kinetics of A $\beta$ (1–40) and A $\beta$ (1–42) Aggregation."  
368 *Chemistry & Biology* 21 (6): 732. <https://doi.org/10.1016/J.CHEMBIOL.2014.03.014>.

369 Gallrein, Christian, Manuel Iburg, Tim Michelberger, Alen Koçak, Dmytro Puchkov, Fan Liu,  
370 Sara Maria Ayala Mariscal, Tanmoyita Nayak, Gabriele S. Kaminski Schierle, and  
371 Janine Kirstein. 2021. "Novel Amyloid-Beta Pathology C. Elegans Model Reveals  
372 Distinct Neurons as Seeds of Pathogenicity." *Progress in Neurobiology* 198 (March).  
373 <https://doi.org/10.1016/J.PNEUROBIO.2020.101907>.

374 Grozdanov, Veselin, Luc Bousset, Meike Hoffmeister, Corinna Bliederaeuser, Christoph  
375 Meier, Karine Madiona, Laura Pieri, et al. 2019. "Increased Immune Activation by  
376 Pathologic A-Synuclein in Parkinson's Disease." *Annals of Neurology* 86 (4): 593–606.  
377 <https://doi.org/10.1002/ana.25557>.

378 Hadi Alijanvand, Saeid, Alessia Peduzzo, and Alexander K. Buell. 2021. "Secondary  
379 Nucleation and the Conservation of Structural Characteristics of Amyloid Fibril Strains."  
380 *Frontiers in Molecular Biosciences* 8 (April): 268.  
381 <https://doi.org/10.3389/fmolb.2021.669994>.

382 Hardenberg, Maarten C., Tessa Sinnige, Sam Casford, Samuel T. Dada, Chetan Poudel,  
383 Elizabeth A. Robinson, Monika Fuxreiter, et al. 2021. "Observation of an  $\alpha$ -Synuclein  
384 Liquid Droplet State and Its Maturation into Lewy Body-like Assemblies." *Journal of*  
385 *Molecular Cell Biology* 13 (4): 282–94. <https://doi.org/10.1093/JMCB/MJAA075>.

386 Hoppe, Simon Oliver, Gamze Uzunoğlu, and Carmen Nussbaum-Krammer. 2021. " $\alpha$ -  
387 Synuclein Strains: Does Amyloid Conformation Explain the Heterogeneity of  
388 Synucleinopathies?" *Biomolecules* 2021, Vol. 11, Page 931 11 (7): 931.  
389 <https://doi.org/10.3390/BIOM11070931>.

390 Klucken, Jochen, Tiago F. Outeiro, Paul Nguyen, Pamela J. McLean, and Bradley T. Hyman.  
391 2006. "Detection of Novel Intracellular Alpha-synuclein Oligomeric Species by  
392 Fluorescence Lifetime Imaging." *The FASEB Journal* 20 (12): 2050–57.  
393 <https://doi.org/10.1096/FJ.05-5422COM>.

394 Laine, Romain F., Tessa Sinnige, Kai Yu Ma, Amanda J. Haack, Chetan Poudel, Peter Gaida,  
395 Nathan Curry, et al. 2019. "Fast Fluorescence Lifetime Imaging Reveals the Aggregation  
396 Processes of  $\alpha$ -Synuclein and Polyglutamine in Aging Caenorhabditis Elegans." *ACS*  
397 *Chemical Biology* 14 (7): 1628–36. <https://doi.org/10.1021/ACSCHEMBIO.9B00354>.

398 Landureau, Maud, Virginie Redeker, Tracy Bellande, Stéphanie Eyquem, and Ronald Melki.  
399 2021. "The Differential Solvent Exposure of N-Terminal Residues Provides  
400 'Fingerprints' of Alpha-Synuclein Fibrillar Polymorphs." *Journal of Biological*  
401 *Chemistry* 296 (January): 100737. <https://doi.org/10.1016/J.JBC.2021.100737>.

402 Luca, Giuseppe De, Dirk Fennema Galparsoro, Giuseppe Sancataldo, Maurizio Leone, Vito  
403 Foderà, and Valeria Vetri. 2020. "Probing Ensemble Polymorphism and Single  
404 Aggregate Structural Heterogeneity in Insulin Amyloid Self-Assembly." *Journal of*  
405 *Colloid and Interface Science* 574 (August): 229–40.  
406 <https://doi.org/10.1016/j.jcis.2020.03.107>.

407 Makky, Ali, Luc Bousset, Jérôme Polesel-Maris, and Ronald Melki. 2016. "Nanomechanical  
408 Properties of Distinct Fibrillar Polymorphs of the Protein  $\alpha$ -Synuclein." *Scientific*  
409 *Reports* 6 (1): 1–10. <https://doi.org/10.1038/srep37970>.

410 Musteikytė, Greta, Akhila K. Jayaram, Catherine K. Xu, Michele Vendruscolo, Georg  
411 Krainer, and Tuomas P.J. Knowles. 2021. “Interactions of  $\alpha$ -Synuclein Oligomers with  
412 Lipid Membranes.” *Biochimica et Biophysica Acta (BBA) - Biomembranes* 1863 (4):  
413 183536. <https://doi.org/10.1016/J.BBAMEM.2020.183536>.

414 Oliveira, Guilherme A.P. de, and Jerson L. Silva. 2019. “Alpha-Synuclein Stepwise  
415 Aggregation Reveals Features of an Early Onset Mutation in Parkinson’s Disease.”  
416 *Communications Biology* 2:1 2 (1): 1–13. <https://doi.org/10.1038/s42003-019-0598-9>.

418 Peelaerts, W., L. Bousset, A. Van Der Perren, A. Moskalyuk, R. Pulizzi, M. Giugliano, C.  
419 Van Den Haute, R. Melki, and V. Baekelandt. 2015. “ $\alpha$ -Synuclein Strains Cause Distinct  
420 Synucleinopathies after Local and Systemic Administration.” *Nature* 522 (7556): 340–  
421 44. <https://doi.org/10.1038/nature14547>.

422 Peng, Chao, Ronald J Gathagan, Dustin J Covell, Coraima Medellin, Anna Stieber, John L  
423 Robinson, Bin Zhang, et al. 2018. “Cellular Milieu Imparts Distinct Pathological  $\alpha$ -  
424 Synuclein Strains in  $\alpha$ -Synucleinopathies.” *Nature* 557 (7706): 558–63.  
425 <https://doi.org/10.1038/s41586-018-0104-4>.

426 Pigazzini, Maria Lucia, Christian Gallrein, Manuel Iburg, Gabriele Kaminski Schierle, and  
427 Janine Kirstein. 2020. “Characterization of Amyloid Structures in Aging C. Elegans  
428 Using Fluorescence Lifetime Imaging.” *JoVE (Journal of Visualized Experiments)* 2020  
429 (157): e61004. <https://doi.org/10.3791/61004>.

430 Rey, Nolwen L., Luc Bousset, Sonia George, Zachary Madaj, Lindsay Meyerdirk, Emily  
431 Schulz, Jennifer A. Steiner, Ronald Melki, and Patrik Brundin. 2019. “ $\alpha$ -Synuclein  
432 Conformational Strains Spread, Seed and Target Neuronal Cells Differentially after  
433 Injection into the Olfactory Bulb.” *Acta Neuropathologica Communications* 2019 7:1 7  
434 (1): 1–18. <https://doi.org/10.1186/S40478-019-0859-3>.

435 Sandhof, Carl Alexander, Simon Oliver Hoppe, Silke Druffel-Augustin, Christian Gallrein,  
436 Janine Kirstein, Cindy Voisine, and Carmen Nussbaum-Krammer. 2020. “Reducing  
437 INS-IGF1 Signaling Protects against Non-Cell Autonomous Vesicle Rupture Caused by  
438 SNCA Spreading.” *Autophagy* 16 (5): 878–99.  
439 <https://doi.org/10.1080/15548627.2019.1643657>.

440 Schierle, Dr Gabriele S. Kaminski, Dr Carlos W. Bertoncini, Fiona T. S. Chan, Annemieke T.  
441 van der Goot, Dr Stefanie Schwedler, Dr Jeremy Skepper, Dr Simon Schlachter, et al.  
442 2011. “A FRET Sensor for Non-Invasive Imaging of Amyloid Formation in Vivo.”  
443 *Chemphyschem : A European Journal of Chemical Physics and Physical Chemistry* 12  
444 (3): 673. <https://doi.org/10.1002/CPHC.201000996>.

445 Shrivastava, Amulya Nidhi, Luc Bousset, Marianne Renner, Virginie Redeker, Jimmy  
446 Savistchenko, Antoine Triller, and Ronald Melki. 2020. “Differential Membrane Binding  
447 and Seeding of Distinct  $\alpha$ -Synuclein Fibrillar Polymorphs.” *Biophysical Journal* 118 (6):  
448 1301. <https://doi.org/10.1016/J.BPJ.2020.01.022>.

449 Woerman, Amanda L., Jan Stöhr, Atsushi Aoyagi, Ryan Rampersaud, Zuzana Krejciova, Joel  
450 C. Watts, Takao Ohyama, et al. 2015. “Propagation of Prions Causing Synucleinopathies  
451 in Cultured Cells.” *Proceedings of the National Academy of Sciences of the United States*  
452 *of America* 112 (35): E4949–58. <https://doi.org/10.1073/pnas.1513426112>.

453  
454

## REVIEWERS' COMMENTS:

### Reviewer #1 (Remarks to the Author):

The authors have made an effort to take into account the referees comments correct the manuscript. I feel that the manuscript could be accepted in present form.

### Reviewer #2 (Remarks to the Author):

Tittelmeier et al. significantly improved their manuscript by adding statistical analyses of their data, including measured interpretation that match their results, and discussing the limitation of the study. I have three minor comments.

1. Most statistical analyses used unpaired T-tests. Did the authors test for normality of the data? If not, or if the data do not follow normal distribution, please use non-parametric statistical tests.
2. It is still unclear to me whether  $\alpha$ -SynA53T-YFP is clinically relevant? Does the mutation happen in human patients? If so, please discuss and cite relevant papers
3. The writing is often unclear, contains many grammar mistakes and typo, and does not do justice to the study. The manuscript can benefit from a good writing or editing service. Here are only a few examples.

a. page 12, lines 336): Incorrect grammar

"Having limited this study to a HEK biosensor cell line, it would be of interest to investigate seeded aggregation of  $\alpha$ -Syn in other cell types, such as neurons or oligodendrocytes to assess whether the processing of fibrillar  $\alpha$ -Syn is also differentially affected by the cellular milieu (Peng et al. 2018).

b. typo: "pave to way forward"

"Future studies using patient-derived  $\alpha$ -Syn conformers in more disease relevant cell types may reveal potential disease-specific members of the proteostasis network that influence the seeded aggregation of  $\alpha$ -Syn, which could explain the heterogeneity of synucleinopathies and pave to way toward disease-specific therapeutics (Hoppe, Uzunoğlu, and Nussbaum-Krammer 2021).

c. page 5 lines 117: Unclear and long sentence, too many comparisons in a single sentence.

"F65 and F91 polymorphs induced the formation of  $\alpha$ -SynA53T-YFP foci (Supplementary Fig. 1C), leading to a decreased mean fluorescence lifetime of  $\alpha$ -SynA53T-YFP in seeded compared to non-seeded cells similar to Fibrils (Fig. 1E-G).

d. Unclear and long sentence.

However, these foci also contained  $\alpha$ -SynA53T YFP species with longer fluorescence lifetimes, resulting in a significantly higher mean than the mean fluorescence lifetime of  $\alpha$ -SynA53T-YFP species in foci seeded with Fibrils, F65 or F91 polymorphs (Fig. 1E, Supplementary Fig. 1D).

### Reviewer #3 (Remarks to the Author):

The authors have addressed my concerns to a reasonable extent.

Dear Reviewer #2,

we have addressed your additional remarks and submitted a revised manuscript for reconsideration. Detailed responses to each of your concerns are listed under the individual comments.

Sincerely,  
Carmen Nußbaum-Krammer

Reviewers' comments:

Reviewer #2

Tittelmeier et al. significantly improved their manuscript by adding statistical analyses of their data, including measured interpretation that match their results, and discussing the limitation of the study. I have three minor comments.

1. Most statistical analyses used unpaired T-tests. Did the authors test for normality of the data? If not, or if the data do not follow normal distribution, please use non-parametric statistical tests.

Data sets were tested for normality and results are provided in the supplementary data files. We have also added a statement to the methods to highlight the employed normality testing.

2. It is still unclear to me whether  $\alpha$ -SynA53T-YFP is clinically relevant? Does the mutation happen in human patients? If so, please discuss and cite relevant papers

The A53T mutation is a clinically relevant missense point mutation that has been associated with autosomal dominant, early-onset PD. We have now highlight that A53T is a disease-related mutation in the description of the biosensor cell line (Line 93).

3. The writing is often unclear, contains many grammar mistakes and typo, and does not do justice to the study. The manuscript can benefit from a good writing or editing service. Here are only a few examples.

a. page 12, lines 336): Incorrect grammar

“Having limited this study to a HEK biosensor cell line, it would be of interest to investigate seeded aggregation of  $\alpha$ -Syn in other cell types, such as neurons or oligodendrocytes to assess whether the processing of fibrillar  $\alpha$ -Syn is also differentially affected by the cellular milieu (Peng et al. 2018).

The sentence was changed to: “It would be of interest to investigate seeded aggregation of  $\alpha$ -Syn in other cell types, such as neurons or oligodendrocytes, to assess whether the processing of fibrillar  $\alpha$ -Syn is also differentially affected by the cellular milieu<sup>6</sup>.”

b. typo: “pave to way forward”

“Future studies using patient-derived  $\alpha$ -Syn conformers in more disease relevant cell types may reveal potential disease-specific members of the proteostasis network that influence the seeded aggregation of  $\alpha$ -Syn, which could explain the heterogeneity of synucleinopathies and pave to way toward disease-specific therapeutics (Hoppe, Uzunoğlu, and Nussbaum-Krammer 2021).

Typo was changed to “pave the way forward”.

c. page 5 lines 117: Unclear and long sentence, too many comparisons in a single sentence. "F65 and F91 polymorphs induced the formation of a-SynA53T-YFP foci (Supplementary Fig. 1C), leading to a decreased mean fluorescence lifetime of a-SynA53T-YFP in seeded compared to non-seeded cells similar to Fibrils (Fig. 1E-G).

The sentence was changed to "Similar to Fibrils, F65 and F91 polymorphs induced the formation of  $\alpha$ -SynA53T-YFP foci. This led to a decreased mean fluorescence lifetime of  $\alpha$ -SynA53T-YFP in seeded compared to non-seeded cells (Fig. 1E-G, Supplementary Fig. 1C)."

d. Unclear and long sentence.

However, these foci also contained a-SynA53T YFP species with longer fluorescence lifetimes, resulting in a significantly higher mean than the mean fluorescence lifetime of a-SynA53T-YFP species in foci seeded with Fibrils, F65 or F91 polymorphs (Fig. 1E, Supplementary Fig. 1D).

The sentence was changed to: "However, these foci also contained  $\alpha$ -SynA53T-YFP species with longer fluorescence lifetimes. Therefore,  $\alpha$ -SynA53T-YFP foci seeded by Ribbons have a significantly higher mean fluorescence lifetime than  $\alpha$ -SynA53T-YFP foci seeded by Fibrils, F65, or F91 polymorphs (Fig. 1E, Supplementary Fig. 1D)."
